# Supplementary material for: Green synthesis of carbon-supported ultrafine ZnS nanoparticles for superior lithium-ion batteries
Source: Royal Society of Chemistry journal article supplement (doi:10.1039/d3dt02407e), 2023-01-01
Supplement: d3dt02407e1.pdf [file d3dt02407e1.pdf]

*Supporting Information*

**Green synthesis of carbon-supported ultrafine ZnS nanoparticles for superior lithium-ion batteries**

Ying-Yi Han<sup>a</sup>, Bi-Cui Chen<sup>b</sup>, Pei-Wen Huang<sup>b</sup>, Yun Chai<sup>b</sup>, Xiao-Hui Wu<sup>b,\*</sup>, and Zai-Lai Xie<sup>a,\*</sup>

<sup>a</sup> Key Laboratory of Advanced Carbon-Based Functional Materials (Fujian Province University),

College of Chemistry, Fuzhou University, Fuzhou 350016, China.

<sup>b</sup>College of Chemistry and Materials Science, Fujian Key Laboratory of Polymer Materials, Fujian

Provincial Key Laboratory of Advanced Materials Oriented Chemical Engineering, Fujian Normal

University, Fuzhou 350007, China

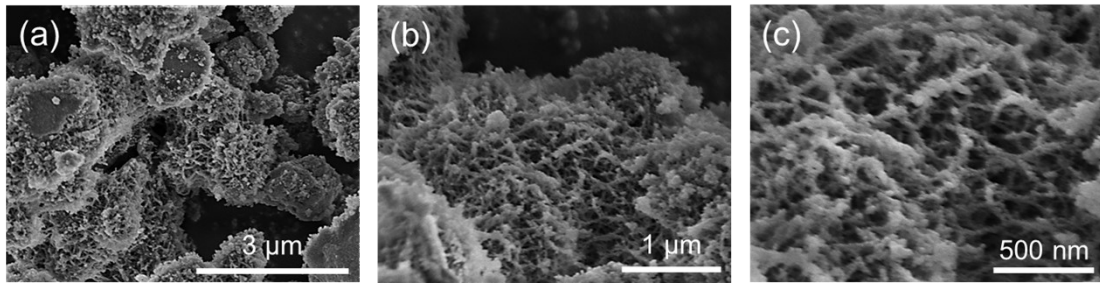

Figure S1. SEM image of ZnS-NC before carbonization.

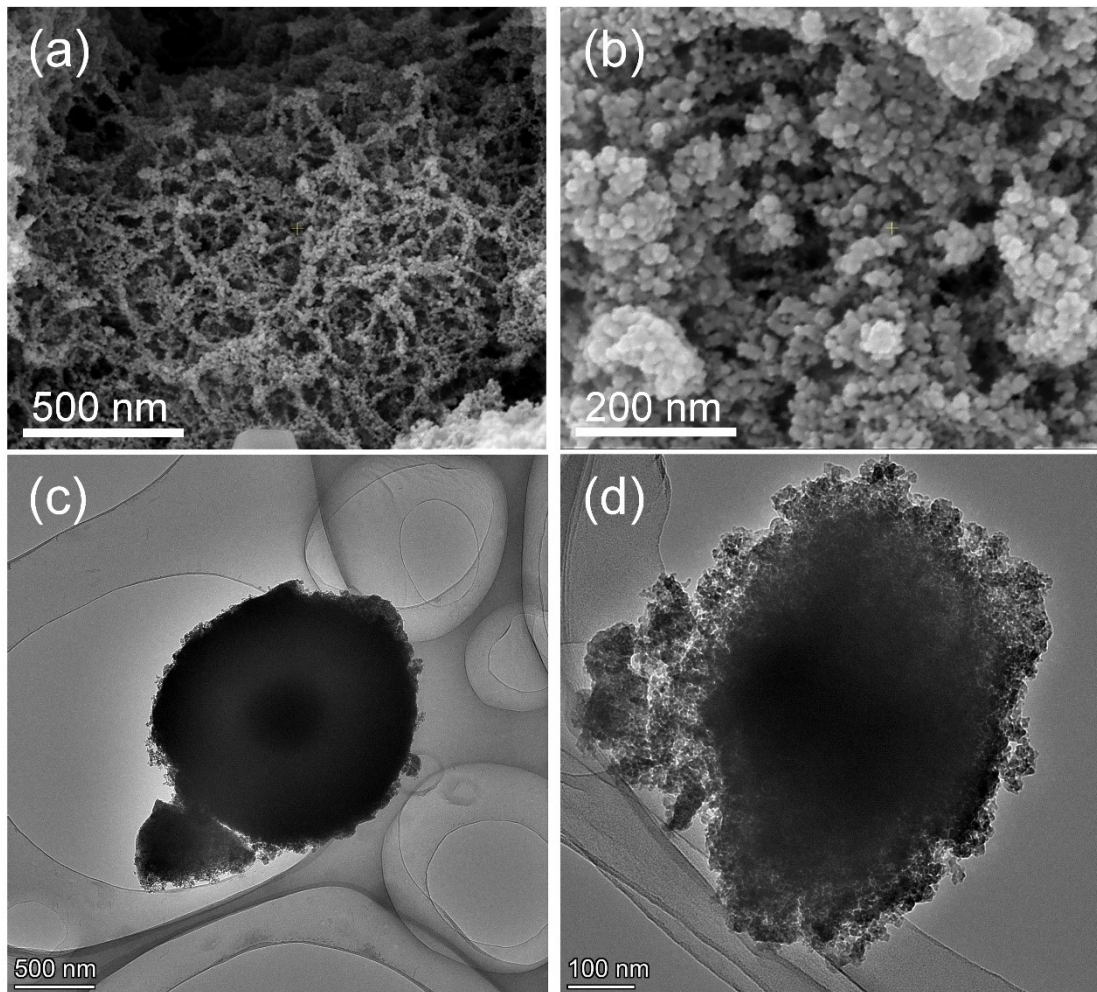

Figure S2. (a-b) SEM images and (c-d) TEM images of ZnS-NC.

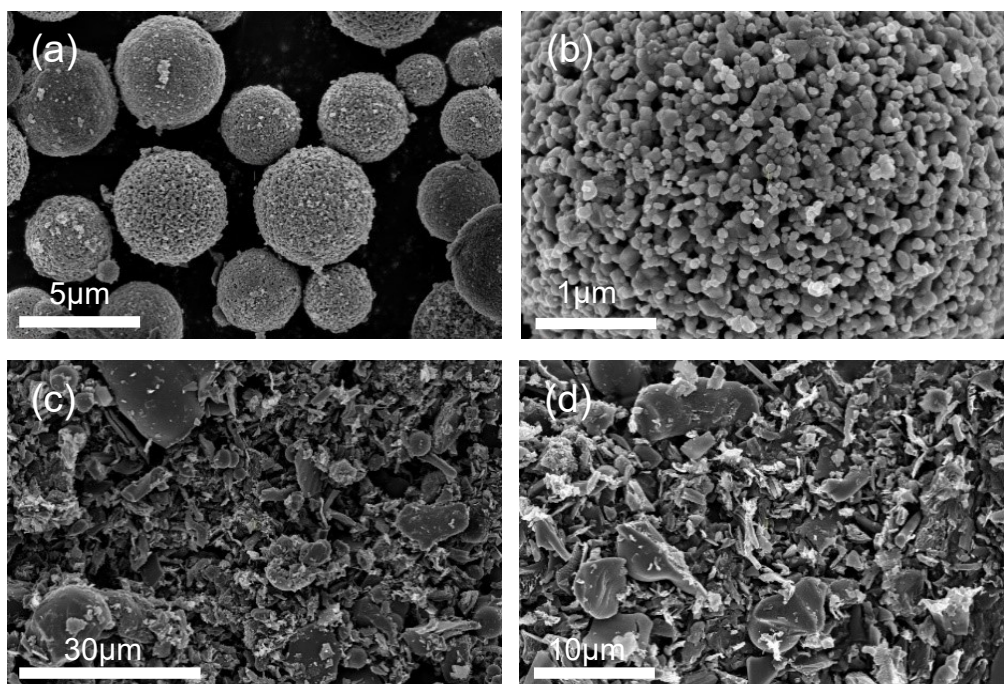

Figure S3. SEM images of (a,b) p-ZnS and (c,d) NC.

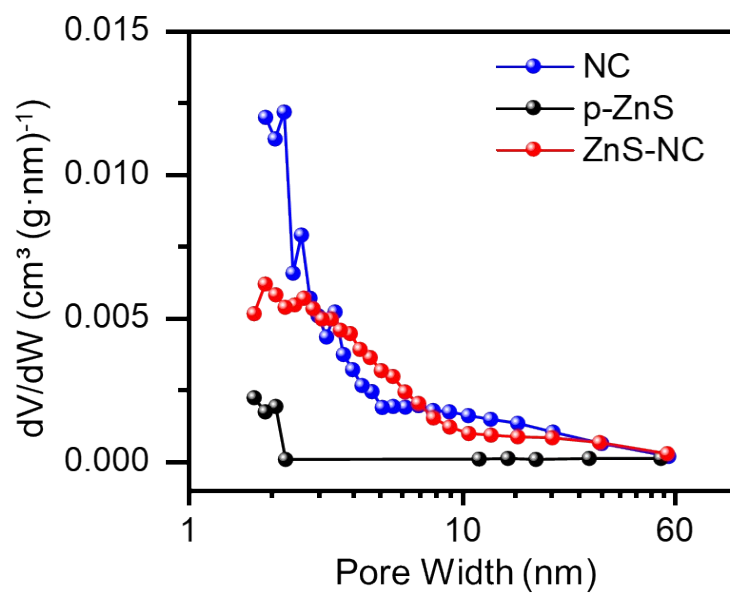

Figure S4. Pore size distribution curves of p-ZnS, NC and ZnS-NC.

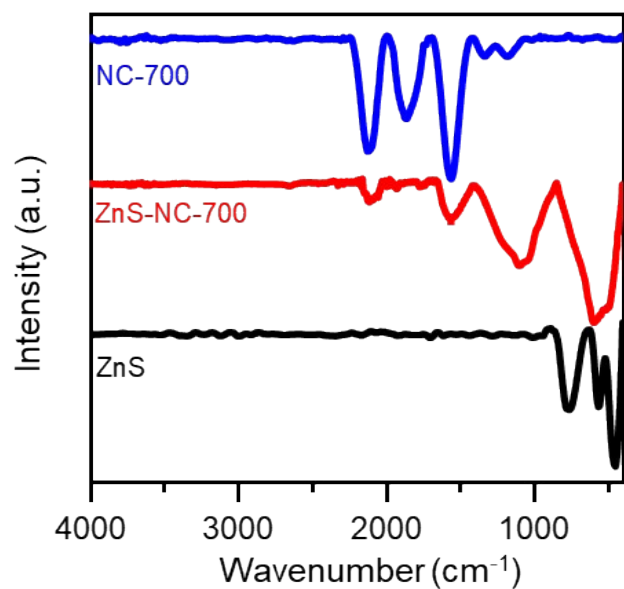

Figure S5. FT-IR spectrum of p-ZnS, NC and ZnS-NC.

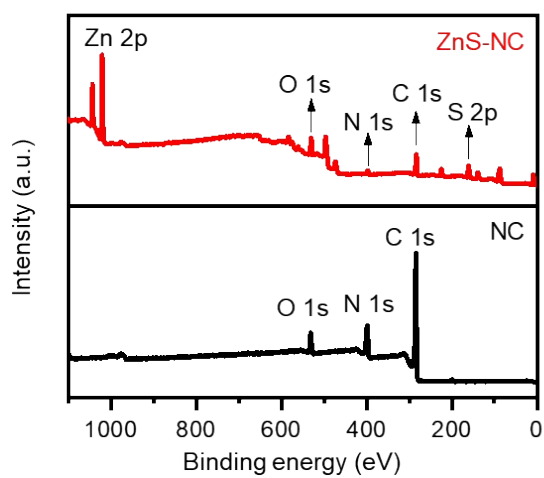

Figure S6. XPS surveys of the ZnS-NC and NC.

Table S1. The content of nitrogen species in ZnS-NC and NC.

| Sample | Graphitic N (%) | Pyrrolic N (%) | Pyridine N (%) |
|--------|-----------------|----------------|----------------|
| ZnS-NC | 28.6            | 8.8            | 62.6           |
| NC     | 25.0            | 37.8           | 37.2           |

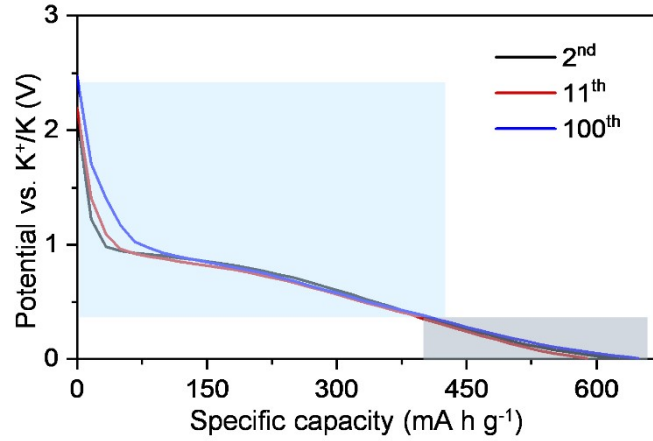

**Figure S7.** The galvanostatic discharge profiles of ZnS-NC at the 2<sup>nd</sup>, 11<sup>th</sup> and 100<sup>th</sup> cycles at 1.0 A g<sup>-1</sup>.

Table S2. The specific capacity increments of ZnS-NC electrode in different voltage ranges.

| Voltage range (V) | Specific capacity (mA h g <sup>-1</sup> ) |                  |                   |                   |                     |
|-------------------|-------------------------------------------|------------------|-------------------|-------------------|---------------------|
|                   | 2 <sup>nd</sup>                           | 11 <sup>th</sup> | 100 <sup>th</sup> | $\Delta C_{11-2}$ | $\Delta C_{100-11}$ |
| 0.3-0.005         | 190                                       | 171              | 214               | -19               | 43                  |
| 3.0-0.3           | 434                                       | 417              | 434               | -32               | 17                  |
| Full range        | 624                                       | 588              | 648               | -70               | 60                  |

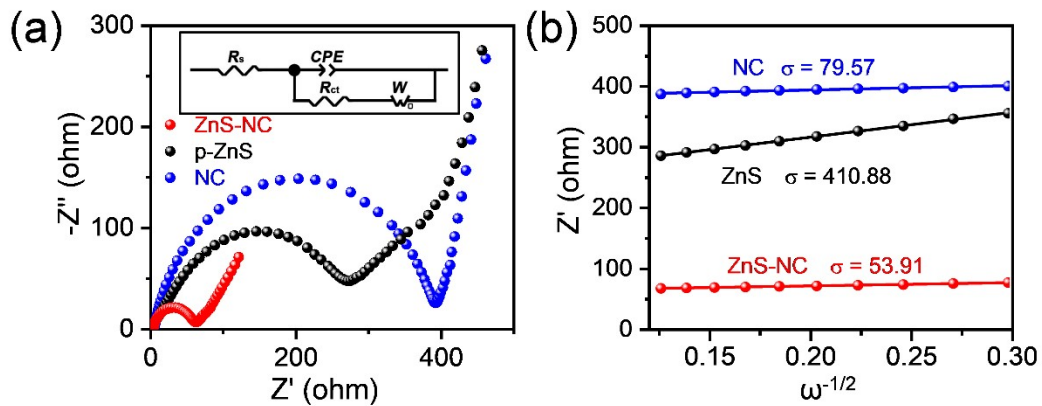

**Figure S8.** (a) Nyquist plots of three electrodes and the inserted simulated equivalent circuit. (b) The real impedance part ( $Z'$ ) versus the reciprocal square root of angular frequency ( $\omega^{-1/2}$ ) of the p-ZnS, NC and ZnS-NC electrodes.

Table S3. The fitted  $R_s$  and  $R_{ct}$  values from EIS spectra for different electrodes.

| Sample | $R_s$ ( $\Omega$ ) | $R_{ct}$ ( $\Omega$ ) |
|--------|--------------------|-----------------------|
| ZnS-NC | 3                  | 54                    |
| p-ZnS  | 3                  | 314                   |
| NC     | 5                  | 390                   |
